# Supplementary material
Source: publisher site journal article supplement (https://www.dovepress.com/article/382311)
Supplement: Supplementary file 1 [file get_supplementary_file.php]

Supplementary Questionnaire

Older Adult Vaccination Scheme Awareness Questionnaire

1. Practice setting

- Primary healthcare service

- Secondary healthcare service

- Tertiary healthcare service

- Private hospital

2. Are you a resident now?

3. Area of expertise

- Primary care physician

- Internal Medicine

- Geriatric Medicine

- Endocrinology

- Rheumatology

- Nephrology

- Medical Oncology

- Gastroenterology

- Immunology

- Hematology

- Infectious Diseases

- Pulmonary Disease

- Neurology

- Dermatology

- Physical medicine and rehabilitation

- Public Health

- Cardiology

- Psychiatry

- Radiology

- Surgical Branches

- Basic Medical Sciences

4. Age

5. Sex

6. Graduation year from medicine school

7. Have you ever checked 'National Adult Vaccination Scheme’?

8. Which of the vaccines were included in the elderly vaccination program?

- Influenza,

- Pneumococcal polysaccharide (PPSV23),

-Pneumococcal conjugate (PCV13)

- Herpes zoster

- Haemophilus influenzae type b (Hib)

- Varicella (VAR)

- Measles, mumps, rubella (MMR)

- Hepatitis A (HepA)

- Hepatitis B (HepB)

- Tetanus, diphtheria, pertussis (Tdap or Td)

9. Have you ever been questioned about the vaccination history of the patients?

10. Have you ever recommended vaccination to your patients?

11. Which of the vaccines have you recommended to your patients?

- Influenza,

- Pneumococcal polysaccharide (PPSV23),

-Pneumococcal conjugate (PCV13)

- Herpes zoster

- Haemophilus influenzae type b (Hib)

- Varicella (VAR)

- Measles, mumps, rubella (MMR)

- Hepatitis A (HepA)

- Hepatitis B (HepB)

- Tetanus, diphtheria, pertussis (Tdap or Td)

-COVID-19

12. Have you ever prescribed a vaccine?

13. Have you ever informed your patients about the COVID-19 vaccine?

14. Who should recommend the vaccines?

-Primary care physician

- Pharmacists

- Internists

- Pulmonologists

- Infectious diseases doctors

- All

15. If you don’t recommend vaccination, the reason is

- I do not have the information.

- I do not believe in the effectiveness of vaccines.

- I have concerns about the safety profile of the vaccines.

- I do not have time in the clinical practice.

- The recommendation is not under my job responsibilities.

16. Have your opinions changed after the pandemic?

17. Which of the vaccines do you recommend most after the pandemic?

- Influenza,

- Pneumococcal polysaccharide (PPSV23),

-Pneumococcal conjugate (PCV13)

- Herpes zoster

- Haemophilus influenzae type b (Hib)

- Varicella (VAR)

- Measles, mumps, rubella (MMR)

- Hepatitis A (HepA)

- Hepatitis B (HepB)

- Tetanus, diphtheria, pertussis (Tdap or Td)

- COVID-19
